# Supplementary material
Source: MDPI journal article supplement (https://www.mdpi.com/2227-9040/11/3/200)
Supplement: s1 [file s1]

## Supplementary Materials

In this work the number of clusters per rod and the number of metal atoms in the cluster were estimated -Table 1. Considering that the average cross-sectional size of the nanorods is 80 nm, we can estimate the amount of gold per rod: with a layer thickness of 4.2 nm there are about  $5.06 \cdot 10^{-16}$  grams per nanorod. Estimated calculations of the number of tin and gold nanoclusters showed that on the samples of ZnO/Au composition ~400-600 gold nanoclusters are located on one nanorod, and on the samples of ZnO/Sn composition ~60-100 tin nanoclusters. Taking the latter into account it is possible to estimate the number of gold atoms in one cluster as  $(0.9 - 1.5) \cdot 10^5$  units, and the number of tin atoms in a cluster as  $(2 - 4) \cdot 10^5$  units. The above estimates show that the formed clusters can be characterized by the bulk properties of the materials of which they are composed.

**Table S1.** Estimation of the parameters of metal clusters on a ZnO nanorod

| Sample    | Thickness Au, nm | Layer thickness d, nm | The volume of the layer on the area $S=1 \text{ m}^2$ , $\text{cm}^3$ | Weight of layer with area $S=1 \text{ m}^2$ , grams | Mass of one rod, grams | Atomic % Au (EDS) |
|-----------|------------------|-----------------------|-----------------------------------------------------------------------|-----------------------------------------------------|------------------------|-------------------|
| ZnO/Au(1) | 4.2              | 4.2E-07               | 4.2E-15                                                               | 8.1E-14                                             | 5.1E-16                | 1.37              |
| ZnO/Au(2) | 2.5              | 2.5E-07               | 2.5E-15                                                               | 4.8E-14                                             | 3.0E-16                | 0.79              |
| ZnO/Sn(1) | 17.2             | 1.7E-06               | 1.7E-14                                                               | 1.3E-13                                             | 7.9E-16                | 4.02              |
| ZnO/Sn(2) | 10.2             | 1E-06                 | 1E-14                                                                 | 7.5E-14                                             | 4.7E-16                | 1.99              |

On fig. 1\* shows the surface composition of the ZnO/Sn(2) and ZnO/Au(2) samples annealed at 200 and 300 °C, since the samples annealed at 100 and 200 °C showed the same results. It can be seen that the quantitative ratio of elements changes as a result of annealing. The decrease in the carbon concentration with increasing annealing temperature is due to its desorption.

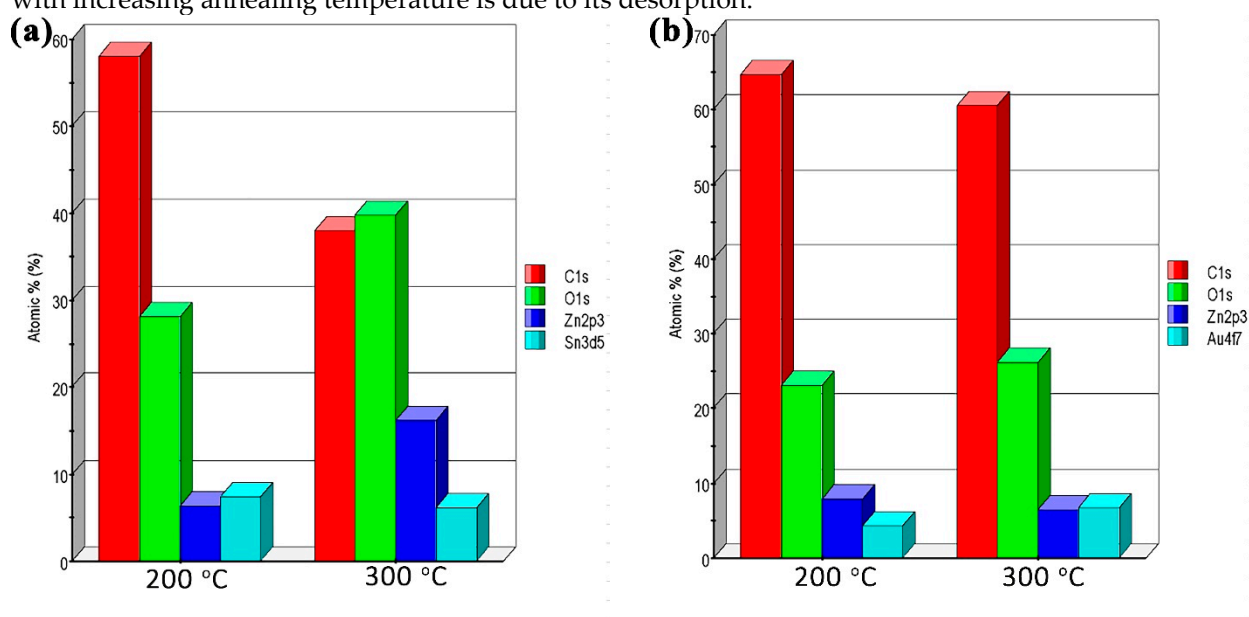

**Figure S1.** \* High-resolution spectra of C1s photoelectronic lines Elemental composition of ZnO/Sn(2) – a and ZnO/Au(2) – b samples annealed at 200 and 300 °C.

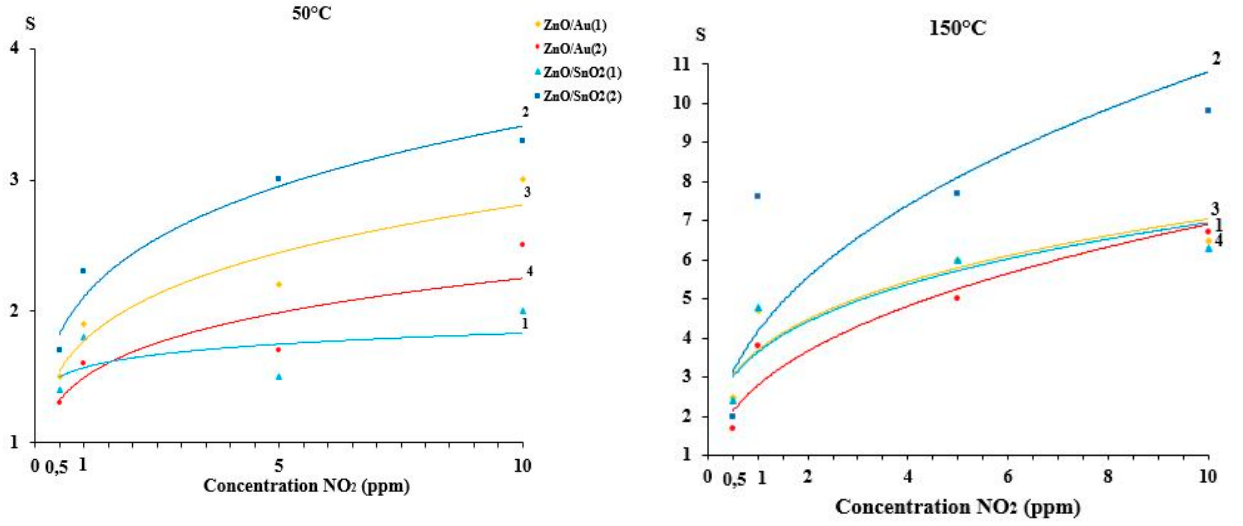

**Figure S2.** Calibration curves of NO<sub>2</sub> sensors based on ZnO/SnO<sub>2</sub> and ZnO/Au NR. Sample composition ZnO/SnO<sub>2</sub>(1)-1, ZnO/SnO<sub>2</sub>(2)-2, ZnO/Au(1)-3, ZnO/Au(2)-4.

The chemoresistive responses obtained depend on the concentration of gas C in accordance with the Freundlich isotherm  $S \sim C^n$ , where the power exponent  $n$  depends on the gas-sensitive material. As can be seen from the graphs, the best response has a sample based on ZnO/SnO<sub>2</sub>(2) NRs.

The contact of zinc oxide nanorods nanocrystallites Au (a) and SnO<sub>2</sub> (b) is shown in Figure 3.

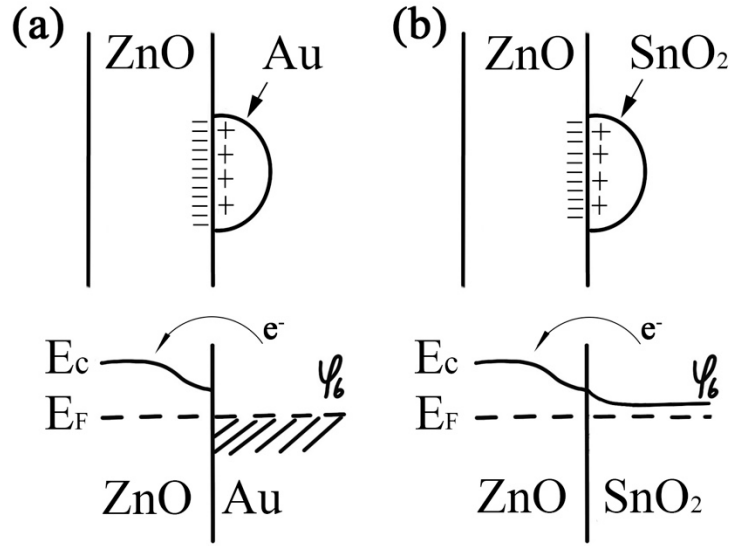

**Figure S3.** The contacts of zinc oxide nanorods and Au(a) and SnO<sub>2</sub> (b) nanocrystallites and the scheme of surface potential formation on the border of ZnO/Au - (a) and ZnO/SnO<sub>2</sub> (b) - heterojunctions
